# Supplementary material for: Improved bone formation and ingrowth for additively manufactured porous Ti6Al4V bone implants with strontium laden nanotube array coating
Source: Royal Society of Chemistry journal article supplement (doi:10.1039/c5ra20370h), 2016-01-01
Supplement: c5ra20370h9.pdf [file c5ra20370h9.pdf]

**Table S1** Primers used for qRT-PCR.

| Gene  | Forward primer sequence(5'-3') | Reverse primer sequence(5'-3') |
|-------|--------------------------------|--------------------------------|
| ALP   | AACGTGGCCAAGAACATCATCA         | TGTCCATCTCCAGCCGTGTC           |
| BMP-2 | CAACACCGTGCTCAGCTTCC           | TTCCCACTCATTTCTGAAAGTTCC       |
| OCN   | GGTGCAGACCTAGCAGACACCA         | AGGTAGCGCCGGAGTCTATTCA         |
| RUNX2 | CCATAACGGTCTTCACAAATCCT        | TCTGTCTGTGCCTTCTTGGTTC         |
| GAPDH | GGCACAGTCAAGGCTGAGAATG         | ATGGTGGTGAAGACGCCAGTA          |

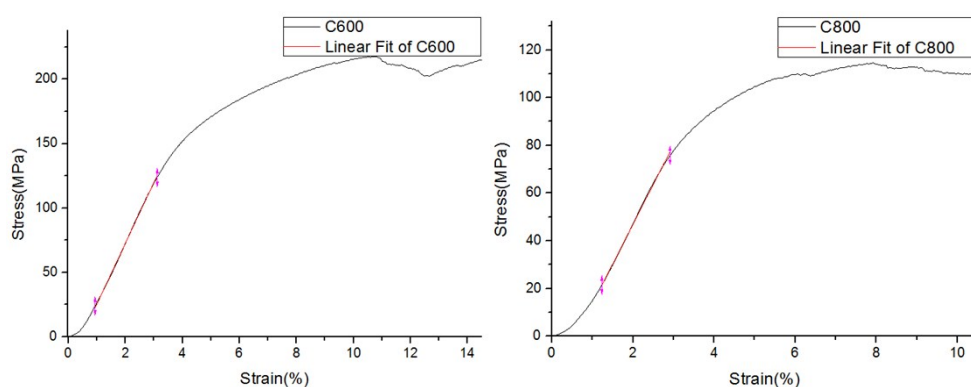

**Fig. S1** Stress-strain curve of C600 and C800.

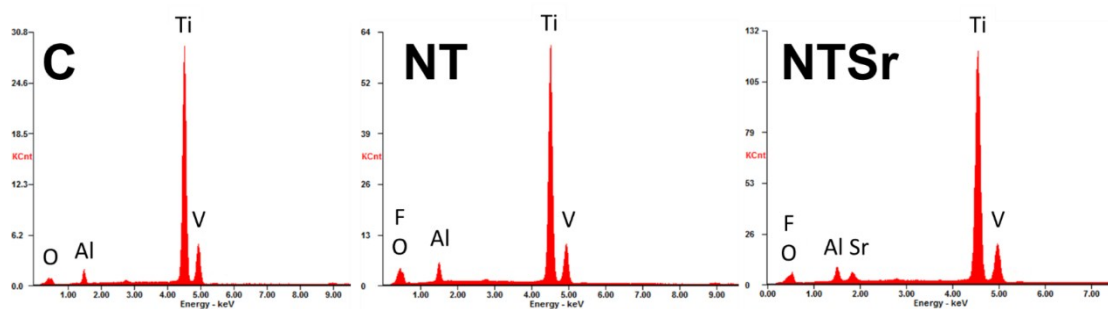

**Fig. S2** Surface element contents of C, NT and NTSr evaluated by EDS gathered under FE-SEM at a magnification of 1000x.
